# Supplementary material for: THetA: inferring intra-tumor heterogeneity from high-throughput DNA sequencing data
Source: Springer Nature journal article supplement (doi:10.1186/gb-2013-14-7-r80), 2013-07-29

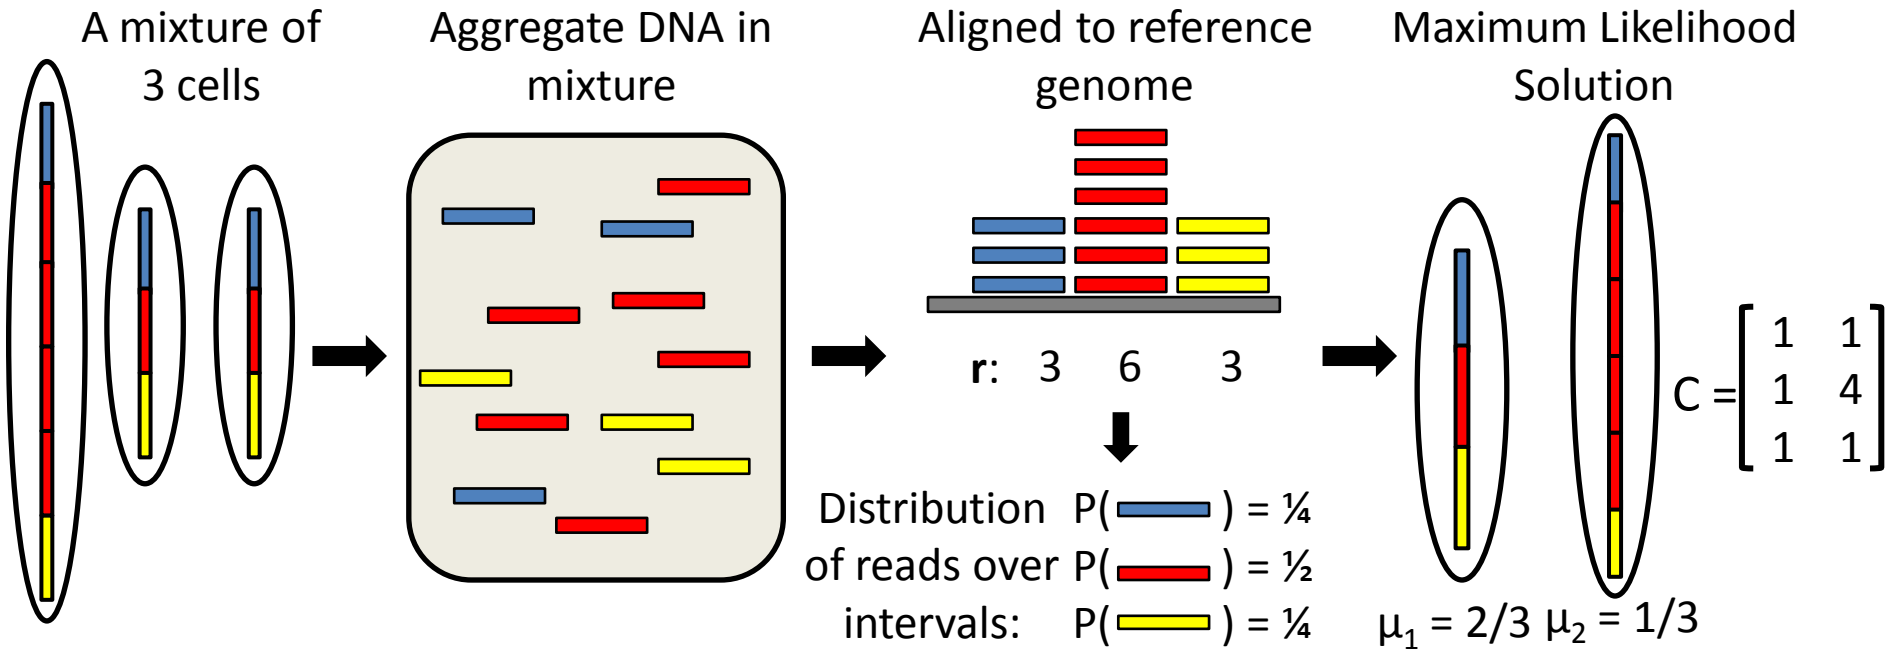

Supplement: 13059_2013_3141_MOESM3_ESM.pdf [file 13059_2013_3141_MOESM3_ESM.pdf]
